# Supplementary material for: Nuclear pore protein NUP210 depletion suppresses metastasis through heterochromatin-mediated disruption of tumor cell mechanical response
Source: PubMed Central journal article supplement (PMC8669001; doi:10.1038/s41467-021-27451-w), 2021-12-13
Supplement: 41467_2021_27451_MOESM1_ESM.pdf [file 41467_2021_27451_MOESM1_ESM.pdf]

## Supplementary Information

**Nuclear pore protein NUP210 depletion suppresses metastasis through heterochromatin-mediated disruption of tumor cell mechanical response**

*Amin et al.*

## Supplementary Fig. 1

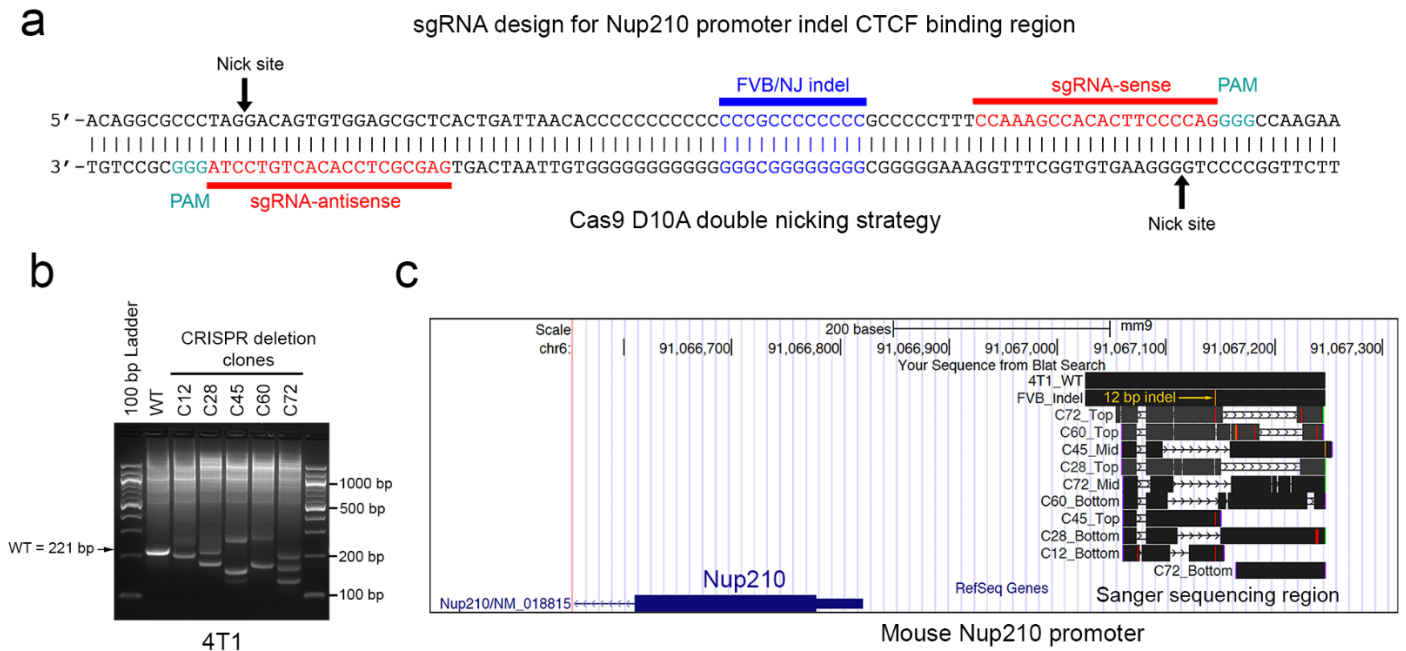

## Supplementary Fig. 1: CRISPR/Cas9-mediated deletion of CTCF binding site on *Nup210* promoter.

- (a) sgRNA design strategy for the deletion of putative CTCF binding site on *Nup210* promoter of 4T1 (BALB/cJ-derived) cells. FVB/NJ 12 bp indel region on CTCF binding site was shown in blue.
- (b) PCR amplification of 221 bp region spanning the Cas9 D10A-deleted CTCF binding site in 4T1 cell clones.
- (c) UCSC genome browser view of the DNA sequences of individual band (top/mid/bottom) obtained from each clone mentioned in (b). Line with arrow indicates mutated region.

## Supplementary Fig. 2

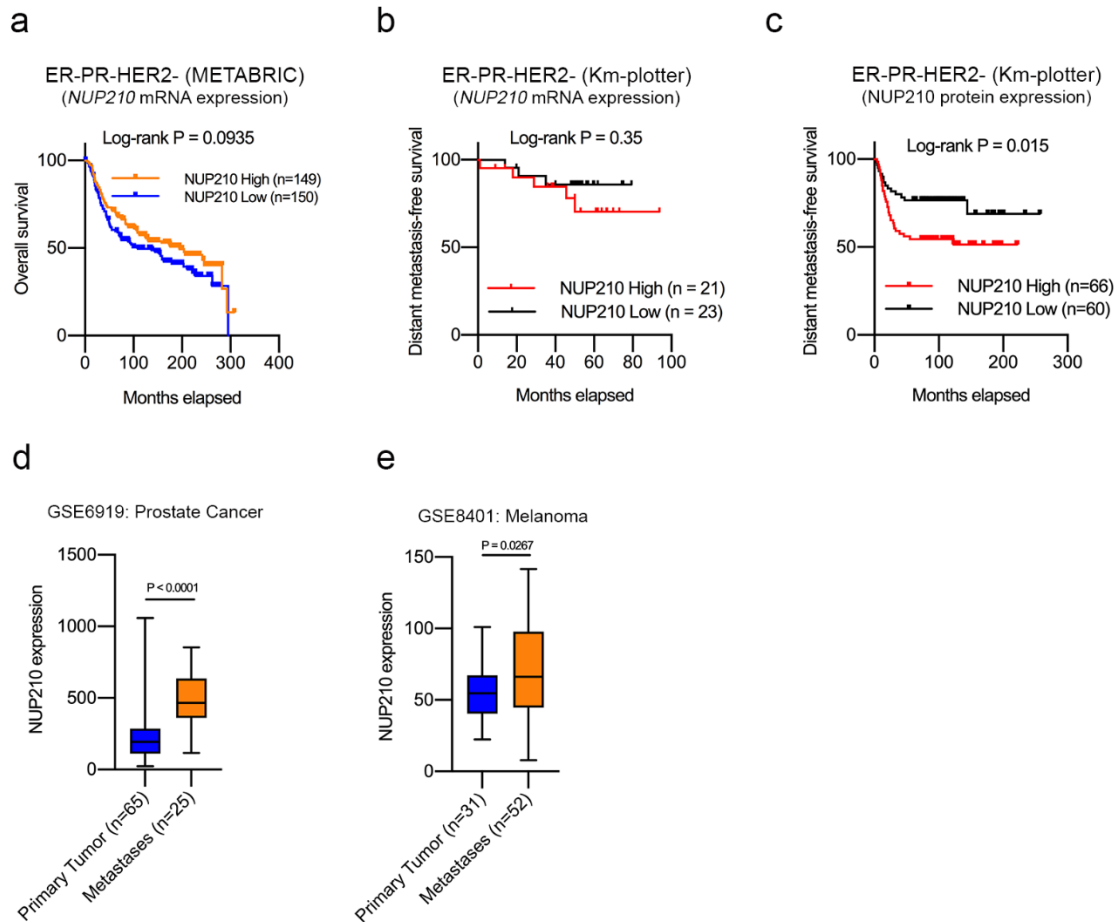

### Supplementary Fig. 2: Association of NUP210 expression in triple negative (ER-/PR-/HER2-) patient and NUP210 expression in human metastases datasets.

(a) Association of NUP210 mRNA with overall survival and (b) DMFS in ER-/PR-/HER2- patients.

(c) Association of NUP210 protein level on distant metastasis-free survival of ER-/PR-/HER2- patient.

(d) Human prostate cancer dataset showing the differential expression of *NUP210* mRNA between primary tumor and metastases. Mann-Whitney U test, the box extends from 25<sup>th</sup> to 75<sup>th</sup> percentile, whiskers extend from smallest values to the largest values, horizontal line represents median.

(e) Human melanoma dataset showing the differential expression of *NUP210* mRNA between primary tumor and metastases. Mann-Whitney U test, the box extends from 25<sup>th</sup> to 75<sup>th</sup> percentile, whiskers extend from smallest values to the largest values, horizontal line represents median.

### Supplementary Fig. 3

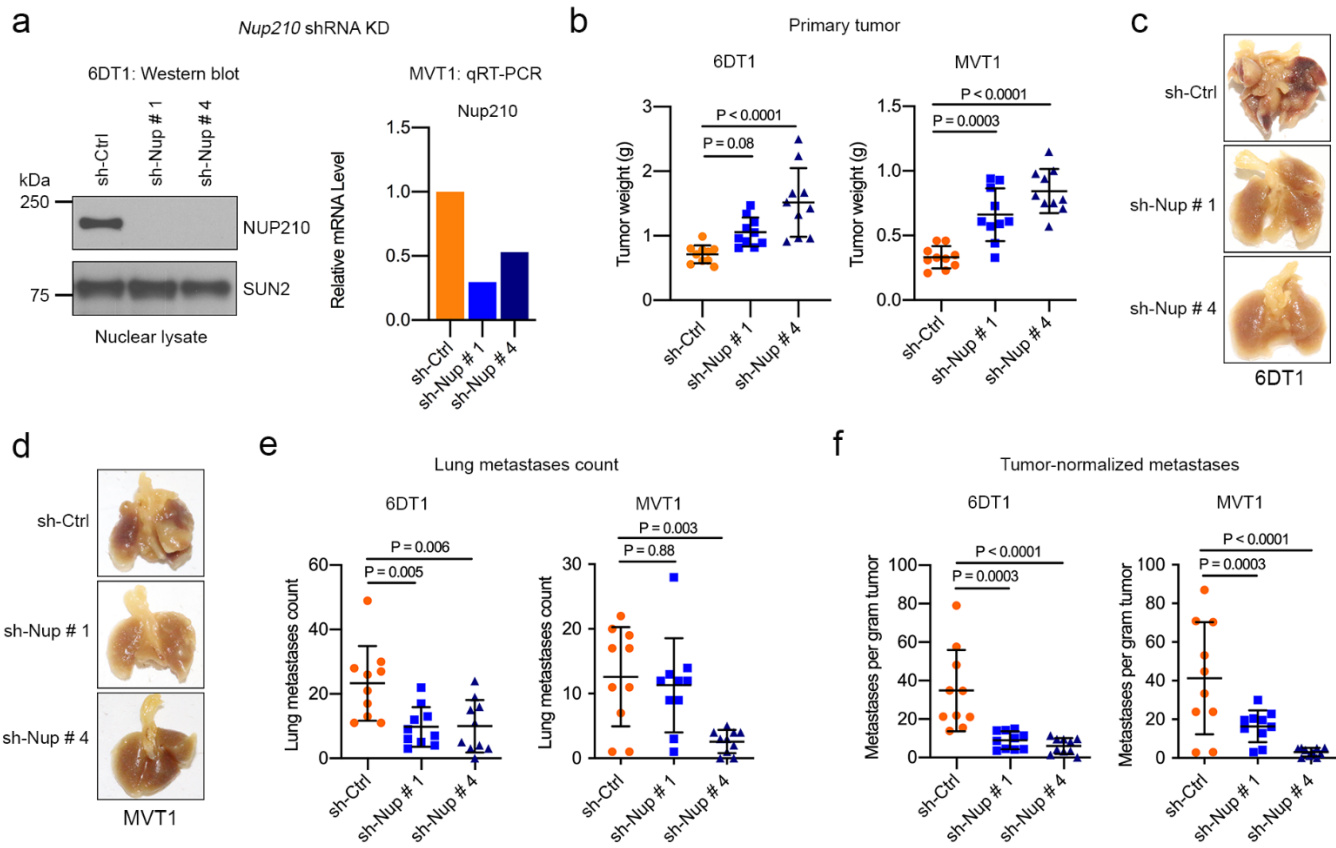

### Supplementary Fig. 3: Knockdown of *Nup210* in the 6DT1 and MVT1 cell lines decreases lung metastasis.

(a) (Left) western blot NUP210 protein of *Nup210* KD 6DT1 cells and (right) qRT-PCR of *Nup210* KD level in MVT1 cells.

(b) Primary tumor weight after orthotopic transplantation of *Nup210* KD 6DT1 (left) or MVT1 (right) cells. ANOVA with Tukey's multiple comparison test, mean  $\pm$  s.d. n = 10 mice per group.

(c) Representative lung images of the mice injected with *Nup210* KD 6DT1 cells.

(d) Representative lung images of the mice injected with *Nup210* KD MVT1 cells.

(e) Lung metastases count after orthotopic transplantation of *Nup210* knockdown 6DT1 (left) and MVT1 (right) cells. ANOVA with Tukey's multiple comparison test, mean  $\pm$  s.d. n = 10 mice per group.

(f) Lung metastases count normalized to primary tumor weight, derived from values shown in (b) and (e). ANOVA with Tukey's multiple comparison test, mean  $\pm$  s.d. n = 10 mice per group.



## Supplementary Fig. 4

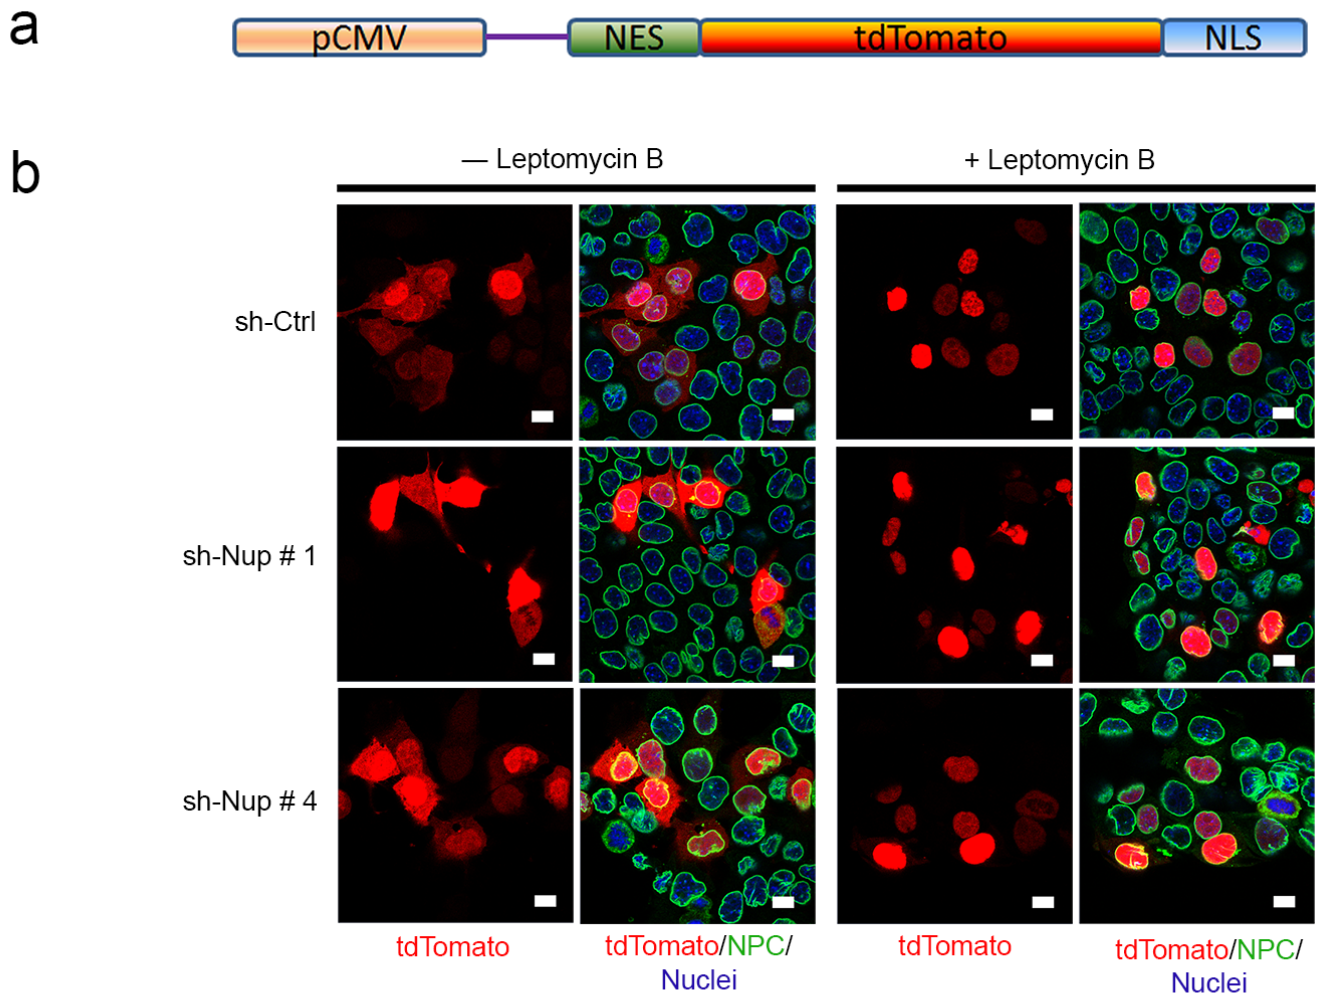

### Supplementary Fig. 4: NUP210 loss does not affect general nucleocytoplasmic protein transport.

(a) Schematic of the tdTomato-expressing nucleocytoplasmic transport reporter. Reporter expression is driven by a CMV promoter and produces tdTomato fused to both a nuclear export (NES) and import (NLS) signal.

(b) Representative immunofluorescence images showing nuclear and cytoplasmic localization of the tdTomato signal in sh-Ctrl and *Nup210* KD 4T1 cells. The Nuclear Pore Complex (NPC) is shown in green. Nuclei are stained with DAPI. Leptomycin B, a nuclear export inhibitor drug, was used as positive control.

Scale bar = 10  $\mu$ m.

**Supplementary Fig. 5**

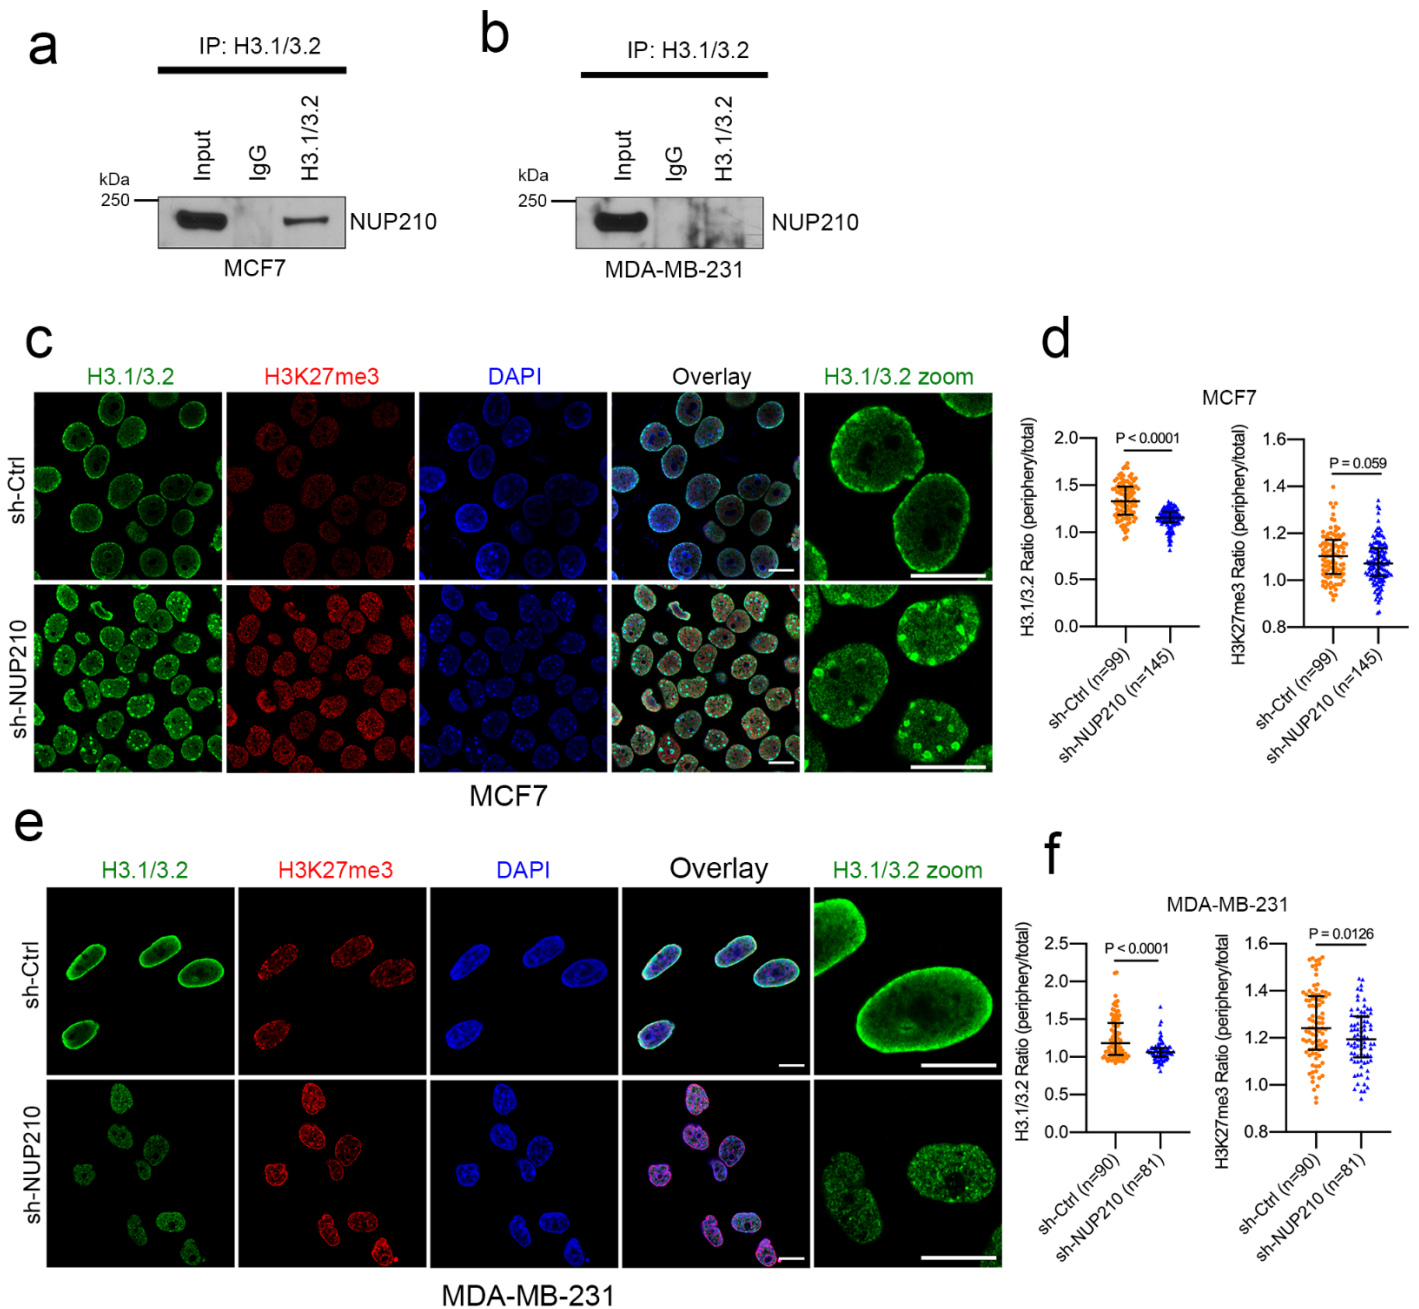

**Supplementary Fig. 5: NUP210 interaction with H3.1/3.2 in human breast cancer cell lines MCF7 and MDA-MB-231.**

(a) Co-IP of NUP210 and H3.1/3.2 in MCF7 cell line.

(b) Co-IP of NUP210 and H3.1/3.2 in MDA-MB-231 cell line.

(c) Immunofluorescence staining of H3.1/3.2 and H3K27me3 in NUP210 knockdown MCF7 cells. Scale bar = 10  $\mu$ m.

(d) Quantification of H3.1/3.2 and H3K27me3 intensity mentioned in (c). Mann-Whitney U test, error bar represents median with interquartile range. 'n' in X-axis represents number of cells analyzed per condition.

(e) Immunofluorescence staining of H3.1/3.2 and H3K27me3 in NUP210 knockdown MDA-MB-231 cells. Scale bar = 10  $\mu\text{m}$ .

(f) Quantification of H3.1/3.2 and H3K27me3 intensity mentioned in (e). Mann-Whitney U test, error bar represents median with interquartile range. 'n' in X-axis represents number of cells analyzed per condition.

## Supplementary Fig. 6

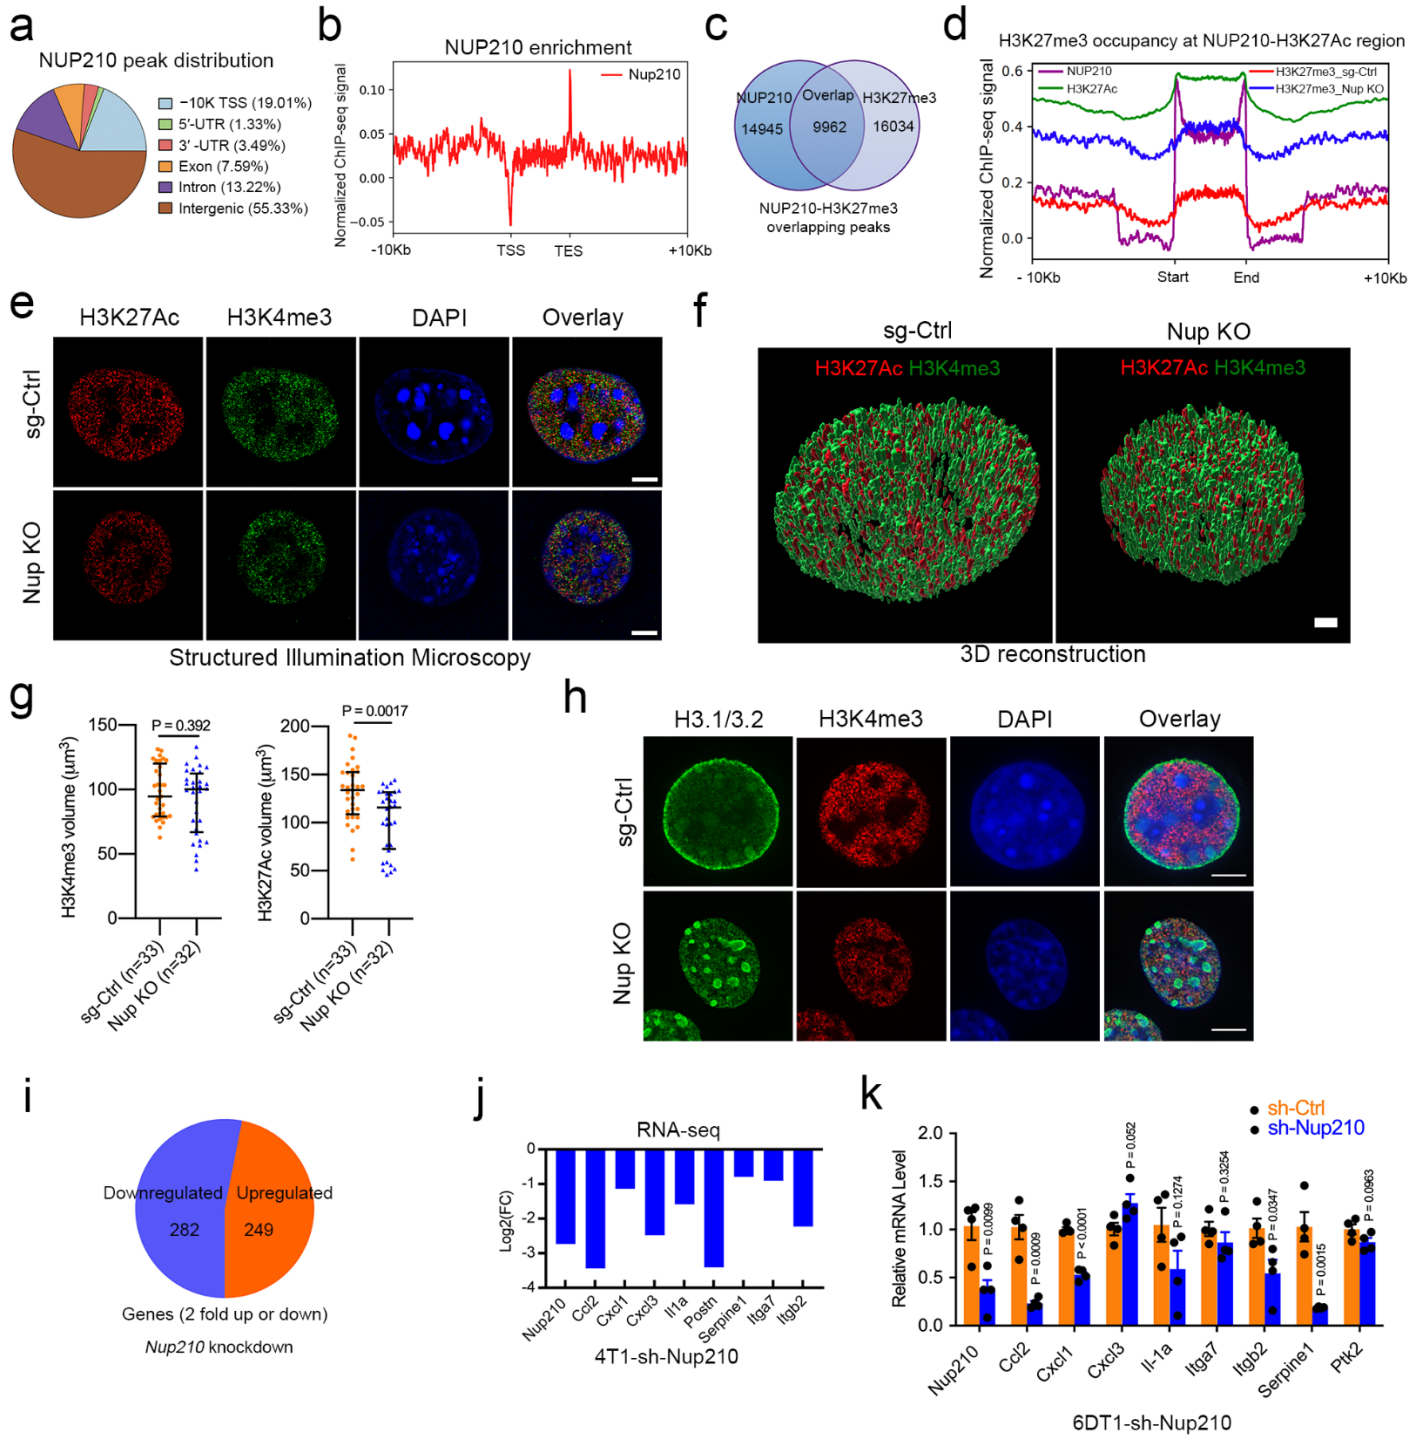

## Supplementary Fig. 6: Related to Figure 5.

(a) Pie chart of NUP210 ChIP-seq peak distribution.

(b) ChIP-seq profile of NUP210 enrichment. TSS = Transcriptional start site, TES = Transcriptional end site.

(c) Overlap of NUP210 and H3K27me3 peaks.

- (d) Occupancy of H3K27me3 peaks within the NUP210-H3K27Ac enhancer overlap region in sg-Ctrl and *Nup210* KO cells.
- (e) Structured Illumination Microscopy images of H3K27Ac and H3K4me3 distribution in *Nup210* KO 4T1 cells. Scale bar = 5  $\mu\text{m}$ .
- (f) 3D reconstruction of H3K27Ac and H3K4me3 volume distribution in *Nup210* KO 4T1 cells. Scale bar = 2  $\mu\text{m}$ .
- (g) Quantification of H3K27Ac and H3K4me3 volume in *Nup210* KO 4T1 cells. Mann-Whitney U test, median with interquartile range. 'n' in X-axis represents number of cells analyzed per condition.
- (h) Representative images of H3.1/3.2 and H3K4me3 distribution in *Nup210* KO 4T1 cells. Scale bar = 5  $\mu\text{m}$ .
- (i) RNA-seq analysis of up- or downregulated genes upon *Nup210* KD.
- (j) Top downregulated genes from the RNA-seq of 4T1 *Nup210* KD (sh # 4) cells. FC=fold change.
- (k) qRT-PCR analysis on *Nup210* KD 6DT1 cells. Multiple two tailed t-test, mean  $\pm$  s.e.m, n = 4 biological replicates.

Supplementary Fig. 7

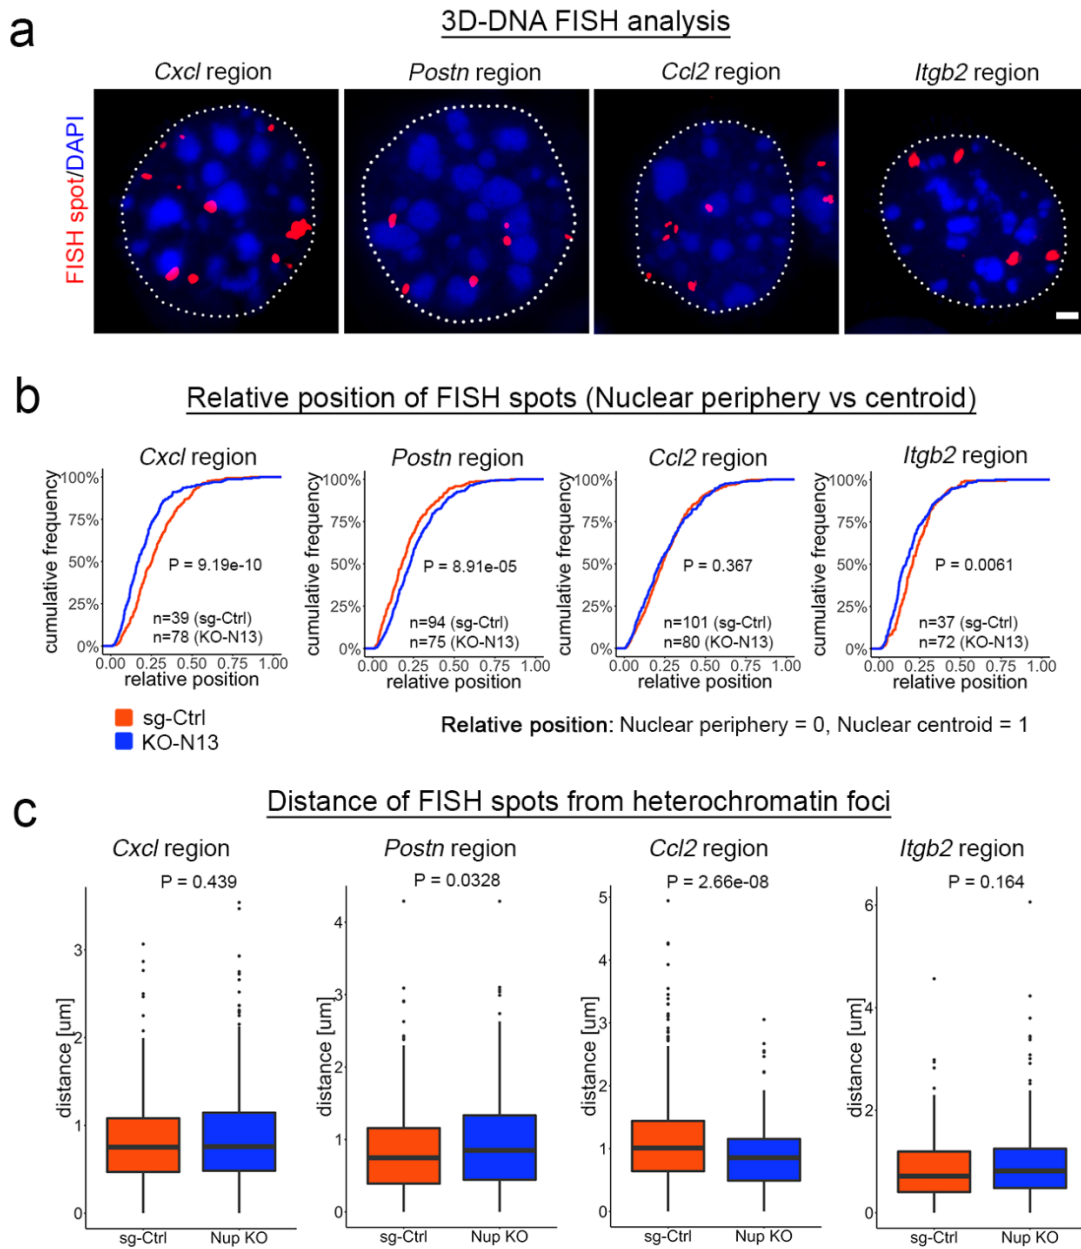

**Supplementary Fig. 7: NUP210 loss is associated with differential repositioning mechanosensitive gene loci.**

(a) Representative images of 3D-DNA FISH of NUP210-regulated gene loci within the nucleus. Scale bar = 2  $\mu\text{m}$ .

(b) Cumulative distribution of FISH spots in nuclear periphery vs nuclear centroid in sg-Ctrl and *Nup210* KO 4T1 cells.

(c) Minimum distance of FISH spots from DAPI-stained heterochromatin foci in sg-Ctrl and *Nup210* KO 4T1 cell nuclei stated in (b). Mann-Whitney U test, the box extends from 25<sup>th</sup> to 75<sup>th</sup> percentile, whiskers extend from smallest values to the largest values, horizontal line represents median.



# Supplementary Fig. 8

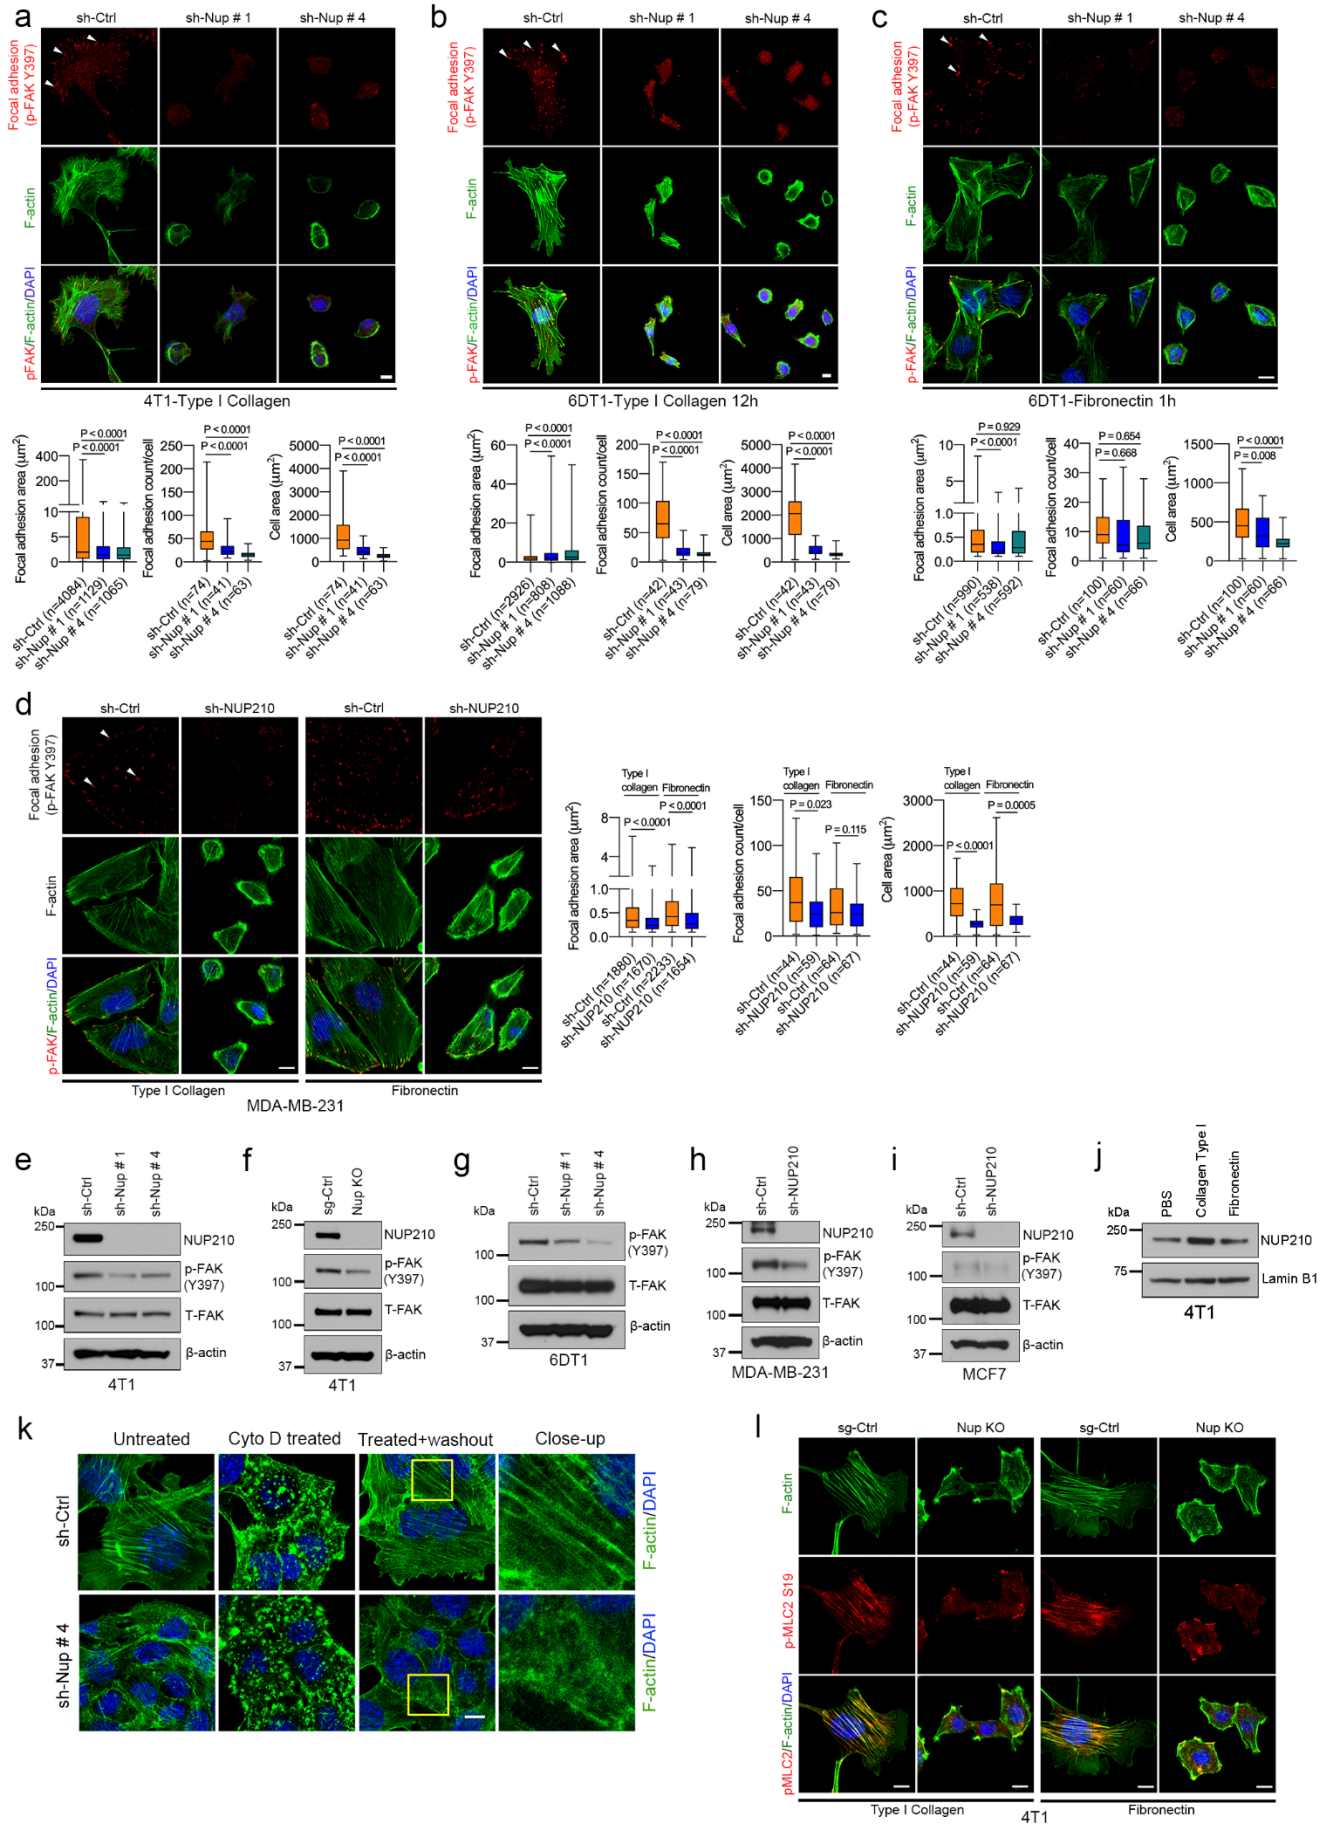

**Supplementary Fig. 8: Related to Figure 6 and 7.**

(a) (Top) Immunostaining of p-FAK Y397 and F-actin in *Nup210* KD 4T1 cells grown on Type I collagen. (Bottom) Quantification of focal adhesion (area, count) and cell spreading. ANOVA with Tukey's multiple comparison test. The box extends from 25<sup>th</sup> to 75<sup>th</sup> percentile, whiskers extend from smallest values to the largest values, horizontal line represents median. Scale bar = 10  $\mu$ m.

(b) (Top) Immunostaining of p-FAK Y397 and F-actin in *Nup210* KD 6DT1 cells grown on Type I collagen. (Bottom) Quantification of focal adhesion (area, count) and cell spreading. ANOVA with Tukey's multiple comparison test. The box extends from 25<sup>th</sup> to 75<sup>th</sup> percentile, whiskers extend from smallest values to the largest values, horizontal line represents median. Scale bar = 10  $\mu$ m.

(c) (Top) Immunostaining of p-FAK Y397 and F-actin in *Nup210* KD 6DT1 cells grown on fibronectin. (Bottom) Quantification of focal adhesion (area, count) and cell spreading. ANOVA with Tukey's multiple comparison test. The box extends from 25<sup>th</sup> to 75<sup>th</sup> percentile, whiskers extend from smallest values to the largest values, horizontal line represents median. Scale bar = 10  $\mu$ m.

(d) (Left) Immunostaining of p-FAK Y397 and F-actin in *NUP210* KD MDA-MB-231 cells grown on Type I collagen or fibronectin. (Right) Quantification of focal adhesion and cell spreading. ANOVA with Tukey's multiple comparison test. The box extends from 25<sup>th</sup> to 75<sup>th</sup> percentile, whiskers extend from smallest values to the largest values, horizontal line represents median. Scale bar = 10  $\mu$ m.

(e) Western blot of total FAK (T-FAK) and p-FAK (Y397) levels in *Nup210* KD 4T1, (f) *Nup210* KO 4T1, (g) *Nup210* KD 6DT1, (h) *NUP210* KD MDA-MB-231 and (i) *NUP210* KD MCF7 cells.

(j) Western blot of NUP210 and Lamin B1 on 4T1 cells grown on either Type I collagen or fibronectin.

(k) Representative images of F-actin stress fibers (phalloidin) after treatment and washout of cytochalasin D in sh-Ctrl and *Nup210* KD 4T1 cells. Scale bar = 10  $\mu$ m.

(l) Representative images showing p-MLC2-S19 and F-actin staining on *Nup210* KO 4T1 cells grown on either Type I collagen or fibronectin. Scale bar = 10  $\mu$ m.



**Supplementary Fig. 9**

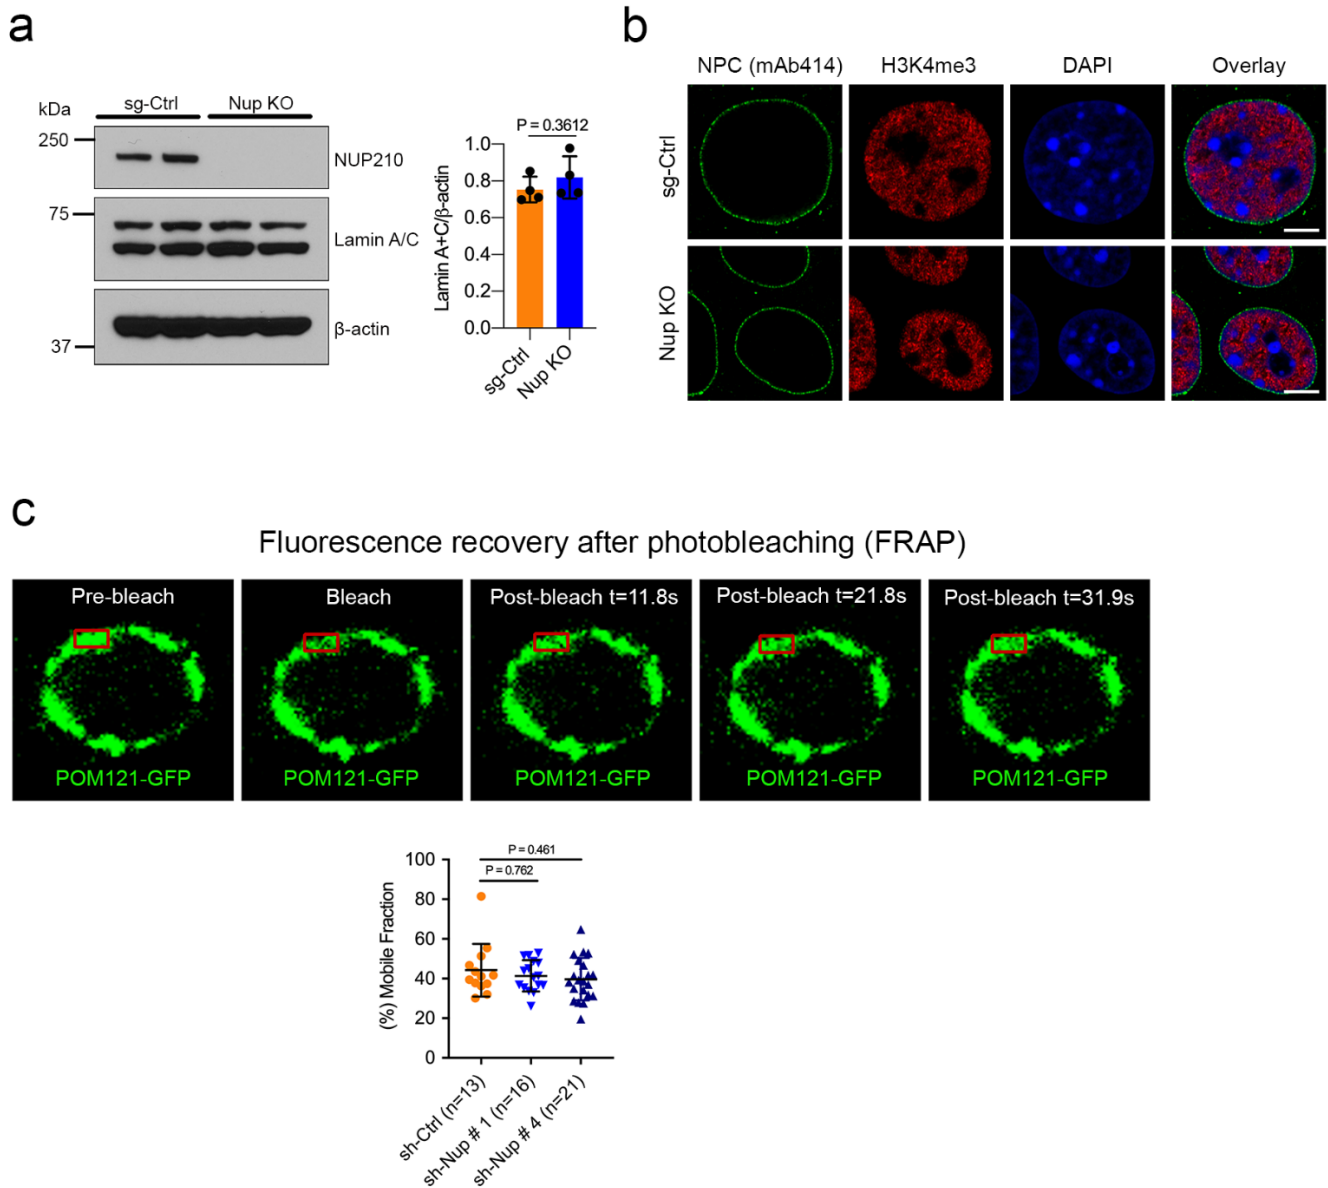

**Supplementary Fig. 9: Effect of *Nup210* KO on Lamin A/C and on the dynamic distribution of nuclear pore structure.**

(a) Representative western blot showing the protein level of Lamin A/C (Left) and densitometry quantification of intensity normalized to  $\beta$ -actin (right). Two tailed t-test, mean  $\pm$  s.d. n = 4 biological replicates.

(b) Representative immunofluorescence images of the nuclear pore complex (stained using mAb414 antibody) and H3K4me3 in *Nup210* KO 4T1 cells. Scale bar = 5  $\mu$ m.

(c) (Top) Fluorescence Recovery after Photobleaching (FRAP) analysis showing the dynamic distribution of GFP-tagged nuclear pore protein, POM121 in *Nup210* KD 4T1 cells. (Bottom) Quantification of POM121-

GFP mobile fraction. ANOVA with Tukey's multiple comparison test, mean  $\pm$  s.d. 'n' in X-axis represents number of cells analyzed per condition.

Supplementary Fig. 10

**a**

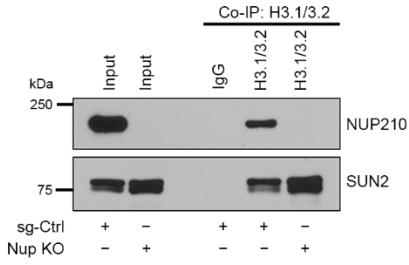

**b**

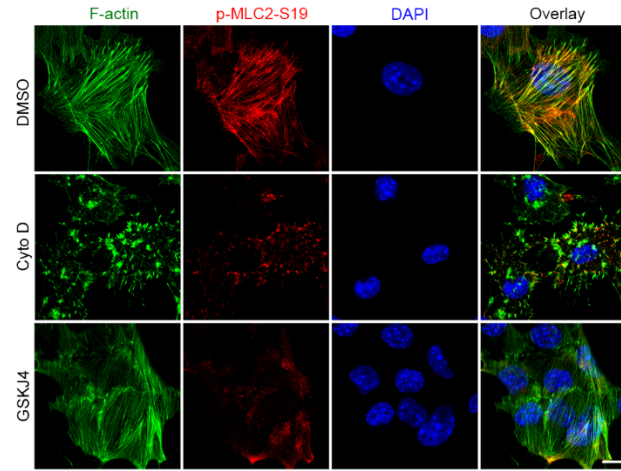

**c**

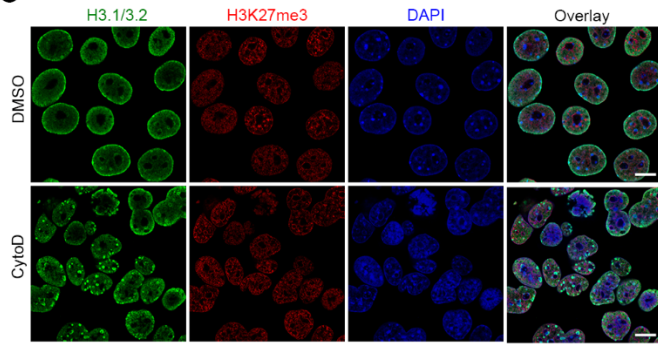

**d**

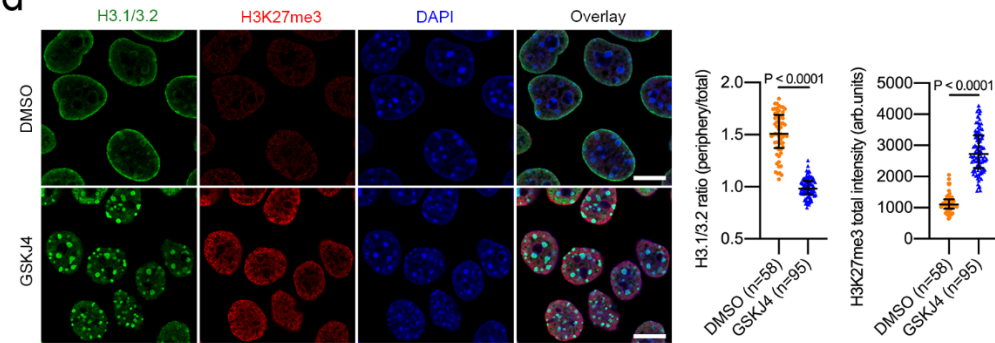

**e**

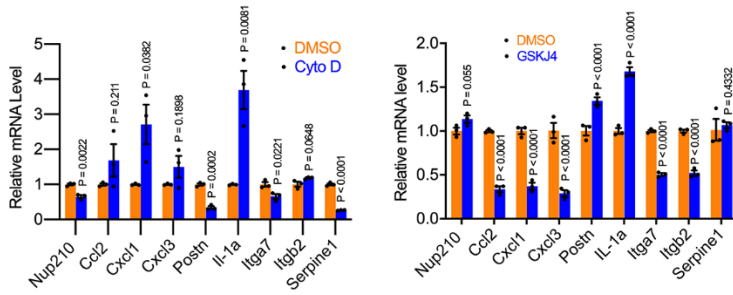

**g**

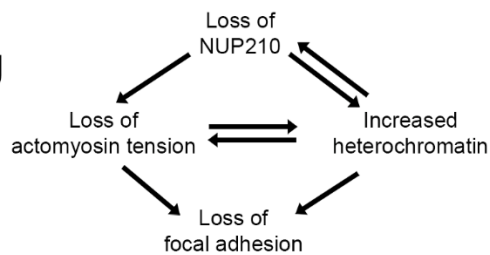

**f**

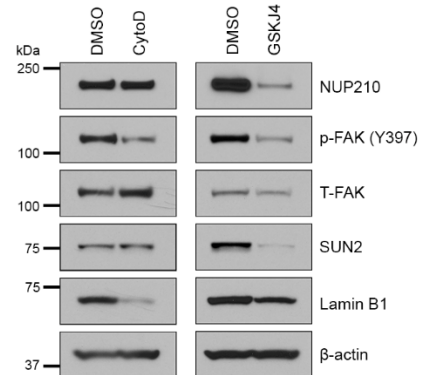

**Supplementary Fig. 10: Related to Figure 8.**

- (a) Co-IP showing the interaction of H3.1/3.2 with NUP210 and SUN2 in *Nup210* KO 4T1 cells.
- (b) Representative immunofluorescence images of F-actin and p-MLC2-S19 staining in Cytochalasin D or GSKJ4-treated 4T1 cells. Scale bar = 10  $\mu\text{m}$ .
- (c) Representative immunofluorescence images of H3.1/3.2 and H3K27me3 staining in Cytochalasin D-treated 4T1 cells. Scale bar = 10  $\mu\text{m}$ .
- (d) (Left) Representative immunofluorescence images of H3.1/3.2 and H3K27me3 staining in GSKJ4-treated 4T1 cells. (Right) Quantification of intensity distribution. Mann-Whitney U test, error bar represents median with interquartile range. 'n' in X-axis represents number of cells analyzed per condition. Scale bar = 10  $\mu\text{m}$ .
- (e) (Left) qRT-PCR of NUP210-regulated genes in Cytochalasin D-treated and (right) GSKJ4-treated 4T1 cells. Multiple two tailed t-test, mean  $\pm$  s.e.m. n = 3 biological replicates.
- (f) Western blot of NUP210, p-FAK Y397, T-FAK, SUN2 and Lamin B1 in either Cytochalasin D- or GSKJ4-treated 4T1 cells.
- (g) Model depicting the feedback loop among the loss of NUP210, actomyosin tension, focal adhesion and heterochromatin regulation.

**Supplementary Table 1: List of Reagents and oligonucleotides:**

| Reagents or resource                                             | Company/source      | Catalog                   |
|------------------------------------------------------------------|---------------------|---------------------------|
| <b>Chemicals and other Reagents</b>                              |                     |                           |
| DMEM                                                             | Gibco               | Cat# 10313021             |
| Fetal Bovine Serum                                               | Gemini Bioproducts  | Cat# 100-106              |
| Penicillin:Streptomycin                                          | Gemini Bioproducts  | Cat# 400-100              |
| L-Glutamine 200 mM                                               | Gibco               | Cat# 25030-081            |
| 0.25% Trypsin-EDTA (1X)                                          | Gibco               | Cat# 25200-056            |
| Puromycin dihydrochloride                                        | Sigma               | Cat# P9620                |
| Blasticidin                                                      | Gibco               | Cat# R210-01              |
| Benzonase Nuclease                                               | Millipore           | Cat# 70664                |
| TriPure Isolation Reagent                                        | Sigma               | Cat# 11667165001          |
| Collagen I, Rat Tail                                             | Gibco               | Cat# A10483-01            |
| Vectashield antifade mounting medium with DAPI                   | Vector Laboratories | Cat# H-1200               |
| RNeasy Mini Kit                                                  | Qiagen              | Cat# 74106                |
| Rnase-Free Dnase Set                                             | Qiagen              | Cat# 79254                |
| DyLight 594 Labeled Anti-Digoxigenin (DIG)                       | Vector Laboratories | Cat# DI-7594              |
| Fibronectin from bovine plasma                                   | Sigma               | Cat# F1141                |
| GSK126                                                           | Selleckchem         | Cat# S7061                |
| GSKJ4                                                            | Selleckchem         | Cat# S7070                |
| FAK inhibitor (PND-1186)                                         | Selleckchem         | Cat# S7653                |
| Leptomycin B                                                     | Cell Signaling Tech | Cat# 9676                 |
| Cytochalasin D                                                   | Sigma               | Cat# C8273                |
| Nuclear Extract Kit                                              | Active Motif        | Cat# 40010                |
| Lab-Tek 2-well chambered glass cover slide                       | Thermo Scientific   | Fisher<br>Cat# 177380     |
| Ibidi $\mu$ slide 4 well                                         | Ibidi Inc.          | Cat# 80426                |
| Ibidi $\mu$ slide 8 well                                         | Ibidi Inc.          | Cat# 80826                |
| Hoechst 33342                                                    | Thermo Scientific   | Fisher<br>Cat# 62249      |
| Corning 96 Well Polystyrene Microplate                           | Corning             | Cat# 3904                 |
| BioCoat Matrigel Invasion Chambers with 8.0 $\mu$ m PET Membrane | Corning Inc.        | Cat# 354480               |
| FxCycle Violet Stain                                             | Thermo Scientific   | Fisher<br>Cat# F10347     |
| Ammonium bicarbonate                                             | Sigma               | Cat# A6141                |
| Dynabead Protein G                                               | Invitrogen          | Cat# 10004D               |
| NuPAGE LDS sample buffer                                         | Invitrogen          | Cat# NP0008               |
| NuPAGE Sample Reducing Agent                                     | Thermo Scientific   | Fisher<br>Cat# NP0009     |
| NuPAGE 3-8% Tris-Acetate protein gel                             | Thermo Scientific   | Fisher<br>Cat# EA0375BOX  |
| NuPAGE 4-12% Bis-Tris protein gel                                | Thermo Scientific   | Fisher<br>Cat# NP0321BOX  |
| Novex 4-20% Tris-Glycine protein gel                             | Thermo Scientific   | Fisher<br>Cat# XP04200BOX |
| Immobilon-P PVDF Membrane                                        | Millipore           | Cat# IPVH07850            |
| KOD Hot Start DNA Polymerase                                     | Millipore           | Cat# 71086                |
| Quick Ligation Kit                                               | New England Biolab  | Cat# M2200                |
| Gateway LR Clonase II Enzyme mix                                 | Thermo Scientific   | Fisher<br>Cat# 11791020   |
| Sall-HF                                                          | New England Biolab  | Cat# R3138S               |
| EcoRV-HF                                                         | New England Biolab  | Cat# R3195S               |

|                                                                                                       |                          |                                                                                               |
|-------------------------------------------------------------------------------------------------------|--------------------------|-----------------------------------------------------------------------------------------------|
| KpnI                                                                                                  | New England Biolab       | Cat# R0142L                                                                                   |
| XhoI                                                                                                  | New England Biolab       | Cat# R0146L                                                                                   |
| T4 DNA ligase                                                                                         | New England Biolab       | Cat# M0202S                                                                                   |
| X-tremeGENE 9 DNA transfection reagent                                                                | Roche                    | Cat# 06365809001                                                                              |
| Nanojuice Transfection Reagent                                                                        | Millipore                | Cat# 71902                                                                                    |
| 35 mm glass-bottom dish                                                                               | MatTek                   | Cat# P35G-1.5-14-C                                                                            |
| Target retrieval solution, citrate pH 6                                                               | Dako                     | Cat# S1699                                                                                    |
| Protein block, serum-free                                                                             | Dako                     | Cat# X0909                                                                                    |
| Antibody diluent                                                                                      | Dako                     | Cat# S3022                                                                                    |
| Evision+System-HRP labelled polymer anti-Rabbit                                                       | Dako                     | Cat# K4003                                                                                    |
| DAB Substrate Kit                                                                                     | Vector lab               | Cat# SK-4100                                                                                  |
| Prolong Glass Antifade Mountant                                                                       | Invitrogen               | Cat# P36982                                                                                   |
| Murine recombinant CCL2                                                                               | Peptotech                | Cat# 250-10                                                                                   |
| iScript cDNA Synthesis Kit                                                                            | Bio-Rad                  | Cat# 1708890                                                                                  |
| FastStart Universal SYBR Green Master (Rox)                                                           | Roche                    | Cat# 4913850001                                                                               |
| FosmidMax DNA Purification Kit                                                                        | Epicentre                | Cat# FMAX046                                                                                  |
| Atto550 NT Labeling Kit                                                                               | Jena Bioscience          | Cat# PP-305S-550                                                                              |
| Digoxigenin NT Labeling Kit                                                                           | Jena Bioscience          | Cat# PP-310S-DIGX                                                                             |
| Click-iT EdU Alexa Fluor 488 Flow Cytometry Assay Kit                                                 | Thermo Scientific Fisher | Cat# C-10425                                                                                  |
| ChIP-IT® Express Enzymatic Kit                                                                        | Active Motif             | Cat# 53009                                                                                    |
| TruSeq ChIP Library Preparation Kit                                                                   | Illumina                 | Cat# IP-202-1012                                                                              |
| TruSeq Stranded mRNA Library Prep Kit                                                                 | Illumina                 | Cat# RS- 122-2201                                                                             |
| Nuclear Complex Co-IP Kit                                                                             | Active Motif             | Cat# 54001                                                                                    |
| Pierce BCA Protein Assay Kit                                                                          | Thermo Scientific Fisher | Cat# 23227                                                                                    |
| pENTR/D-TOPO Cloning Kit                                                                              | Thermo Scientific Fisher | Cat# K240020                                                                                  |
| Dual-Luciferase Reporter Assay System                                                                 | Promega                  | Cat# E1960                                                                                    |
| <b>Oligonucleotides</b>                                                                               |                          |                                                                                               |
| qRT-PCR primer for Nup210:<br>Forward: GGGCGCACGATGTTTCAGAA<br>Reverse: CACCACCAGGTCGAAATGGG          | PrimerBank               | <a href="https://pga.mgh.harvard.edu/primerbank/">https://pga.mgh.harvard.edu/primerbank/</a> |
| qRT-PCR primer for Ppib:<br>Forward: GGAGATGGCACAGGAGGAAAGAG<br>Reverse: TGTGAGCCATTGGTGTCTTTGC       | This paper               | N/A                                                                                           |
| qRT-PCR primer for Gapdh:<br>Forward: AGGTCGGTGTGAACGGATTTG<br>Reverse: TGTAGACCATGTAGTTGAGGTCA       | PrimerBank               | <a href="https://pga.mgh.harvard.edu/primerbank/">https://pga.mgh.harvard.edu/primerbank/</a> |
| qRT-PCR primer for Ccl2:<br>Forward:<br>ATTAAAAACCTGGATCGGAACCAA<br>Reverse: GCATTAGCTTCAGATTTACGGGTC | This paper               | N/A                                                                                           |
| qRT-PCR primer for Cxcl1:<br>Forward: CTGGGATTCACCTCAAGAACATC<br>Reverse: CAGGGTCAAGGCAAGCCTC         | PrimerBank               | <a href="https://pga.mgh.harvard.edu/primerbank/">https://pga.mgh.harvard.edu/primerbank/</a> |
| qRT-PCR primer for Cxcl3:<br>Forward: CCCAGACAGAAGTCATAGCCACT<br>Reverse: TTCATCATGGTGAGGGGCTTC       | This paper               | N/A                                                                                           |
| qRT-PCR primer for Postn:<br>Forward: AATGCTGCCCTGGCTATATGAG<br>Reverse: GTAGTGGCTCCCACAATGCC         | This paper               | N/A                                                                                           |

|                                                                                                                                                                                                                                                      |                    |                                                                                                   |
|------------------------------------------------------------------------------------------------------------------------------------------------------------------------------------------------------------------------------------------------------|--------------------|---------------------------------------------------------------------------------------------------|
| qRT-PCR primer for Il1a (IL-1a):<br>Forward: CGAAGACTACAGTTCTGCCATT<br>Reverse: GACGTTTCAGAGGTTCTCAGAG                                                                                                                                               | PrimerBank         | <a href="https://pga.mgh.harvard.edu/primerbank/">https://pga.mgh.harvard.edu/primerbank/</a>     |
| qRT-PCR primer for Itga7:<br>Forward: CTGCTGTGGAAGCTGGGATTC<br>Reverse: CTCCTCCTTGAAGTCTGTCTG                                                                                                                                                        | PrimerBank         | <a href="https://pga.mgh.harvard.edu/primerbank/">https://pga.mgh.harvard.edu/primerbank/</a>     |
| qRT-PCR primer for Itgb2:<br>Forward: CAGGAATGCACCAAGTACAAAGT<br>Reverse: CCTGGTCCAGTGAAGTTCAGC                                                                                                                                                      | PrimerBank         | <a href="https://pga.mgh.harvard.edu/primerbank/">https://pga.mgh.harvard.edu/primerbank/</a>     |
| qRT-PCR primer for Serpine1:<br>Forward: TTCAGCCCTTGCTTGCCCTC<br>Reverse: ACACTTTTACTCCGAAGTCGGT                                                                                                                                                     | PrimerBank         | <a href="https://pga.mgh.harvard.edu/primerbank/">https://pga.mgh.harvard.edu/primerbank/</a>     |
| qRT-PCR primer for Ier3:<br>Forward: GCTCTGGTCCCGAAATTTTCA<br>Reverse: AGATGATGGCGAACAGGAGAA                                                                                                                                                         | PrimerBank         | <a href="https://pga.mgh.harvard.edu/primerbank/">https://pga.mgh.harvard.edu/primerbank/</a>     |
| qRT-PCR primer for Brd4-SF<br>Forward: ATCCCCTGGGGTGGATTAGT<br>Reverse: AGAGGACCCCAGATGACCAG                                                                                                                                                         | This paper         | N/A                                                                                               |
| qRT-PCR primer for Yap1<br>Forward: TACTGATGCAGGTAAGTCTGCGG<br>Reverse: TCAGGGATCTCAAAGGAGGAC                                                                                                                                                        | PrimerBank         | <a href="https://pga.mgh.harvard.edu/primerbank/">https://pga.mgh.harvard.edu/primerbank/</a>     |
| qRT-PCR primer for Mrtf-a<br>Forward: CTGGTGAGCCAAGGGATCAT<br>Reverse: TCAGCCGAGGTCTCTTCCAG                                                                                                                                                          | This paper         | N/A                                                                                               |
| qRT-PCR primer for Ptk2 (FAK)<br>Forward: GAGTACGTCCCTATGGTGAAGG<br>Reverse: CTCGATCTCTCGATGAGTGCT                                                                                                                                                   | PrimerBank         | <a href="https://pga.mgh.harvard.edu/primerbank/">https://pga.mgh.harvard.edu/primerbank/</a>     |
| Nup210 targeting sgRNA cloning primer:<br>sgRNA-sense:<br>CACCGCGACACCATCCTAGTGTCT<br>sgRNA-antisense:<br>AAACAGACACTAGGATGGTGTCGC                                                                                                                   | This paper         | N/A                                                                                               |
| sgRNA non-targeting control sequence:<br>CCATATCGGGGCGAGACATG                                                                                                                                                                                        | Ji Luo Lab (NCI)   | N/A                                                                                               |
| Nup210 KO sgRNA sequencing primer:<br>Forward: TGTGTGCCTGCTTCAGGATAAG                                                                                                                                                                                |                    |                                                                                                   |
| sgRNA targeting Nup210 promoter CTCF binding site:<br>sg-sense-Top:<br>ACCGCCAAAGCCACACTTCCCCAG<br>sg-sense-Bottom:<br>AAACCTGGGGAAGTGTGGCTTTGG<br>sg-antisense-Top:<br>ACCGGAGCGCTCCACACTGTCCTA<br>sg-antisense-Bottom:<br>AAACTAGGACAGTGTGGAGCGCTC | This paper         | N/A                                                                                               |
| Nup210 promoter sgRNA sequencing primer:<br>Forward: CTTGATGTACTGCCAAGTGGGC                                                                                                                                                                          | Chiang et al. 2016 | <a href="https://www.nature.com/articles/srep24356">https://www.nature.com/articles/srep24356</a> |
| Primer for Histone H3.1 cloning into pENTR/D-TOPO vector<br>Histone H3.1 Forward:<br>CACCATGGACTACAAAGACCATGACGG<br>Histone H3.1 Reverse:<br>TGCCCTTCCCCACGGAT                                                                                       | This paper         | N/A                                                                                               |

|                                                                                                                                                                                  |                          |                     |
|----------------------------------------------------------------------------------------------------------------------------------------------------------------------------------|--------------------------|---------------------|
| Histone H3.3 Reverse:<br>AGCTCTCTCTCCCCGTATCC                                                                                                                                    |                          |                     |
| Nup210 promoter cloning primer:<br>KpnI-Nup210-prom-Forward:<br>TGCTTA- GGTACC-<br>TTGTCCTGCTGATGGATTGAT<br>XhoI-Nup210-prom-Reverse:<br>TAAGCA-CTCGAG-<br>AGCAGCACCTTGGGAATGTTA | This paper               | N/A                 |
| Primer for cloning mouse FAK into pENTR/D-TOPO vector<br>FAK-Forward:<br>CACCATGGCAGCTGCTTATCTTGACCC<br>FAK-Reverse:<br>GTGTGGCCGTGTCTGCCC                                       | This paper               | N/A                 |
| Primer for cloning mouse Ccl2 into pENTR/D-TOPO vector<br>Ccl2-Forward:<br>CACCATGCAGGTCCCTGTCATGCTTC<br>Ccl2-Reverse:<br>GTTCACTGTCACTGGTCACTCC                                 | This paper               | N/A                 |
| ChIP qRT-PCR primer for CTCF and H3K27Ac enrichment on Nup210 promoter:<br>Forward: CTGCTGATGGATTGATCCCGG<br>Reverse: GTGTGGAGCGCTCACTGATT                                       | This paper               | N/A                 |
| <b>Plasmids:</b>                                                                                                                                                                 |                          |                     |
| Plasmid: pxPAX2                                                                                                                                                                  | Addgene                  | Cat# 12260          |
| Plasmid: pMD2.G                                                                                                                                                                  | Addgene                  | Cat# 12259          |
| Plasmid: lentiGuide-puro                                                                                                                                                         | Addgene                  | Cat# 52963          |
| Plasmid: Ad (RGD)-GFP-Cas9                                                                                                                                                       | Vector Biolab            | Cat# 1903           |
| Plasmid: AIO-GFP                                                                                                                                                                 | Addgene                  | Cat# 74119          |
| Plasmid: pCMV6-mNup210                                                                                                                                                           | Origene Technologies     | Cat# MR219004       |
| Plasmid: pDest-658-mPol2-mNup210-Myc                                                                                                                                             | This Study               | N/A                 |
| Plasmid: pENTR/D-TOPO                                                                                                                                                            | Thermo Fisher Scientific | Cat# K240020        |
| Plasmid: POM121-GFP                                                                                                                                                              | Genecopoeia              | Cat# EX-Mm22993-M98 |
| Plasmid: pDest-659-3X-Flag-Histone H3.1                                                                                                                                          | This Study               | N/A                 |
| Plasmid: pMXs-puro-EGFP-FAK                                                                                                                                                      | Addgene                  | Cat# 38194          |
| Plasmid: pDest-659-FAK-myc                                                                                                                                                       | This Study               | N/A                 |
| Plasmid: pDest-659-Ccl2-myc                                                                                                                                                      | This Study               | N/A                 |
| BAC clone: RP23-374O6                                                                                                                                                            | CHORI                    | N/A                 |
| BAC clone: RP23-480C1                                                                                                                                                            | CHORI                    | N/A                 |
| BAC clone: RP23-99N1                                                                                                                                                             | CHORI                    | N/A                 |
| BAC clone: RP23-166E21                                                                                                                                                           | CHORI                    | N/A                 |
